# Supplementary material
Source: PubMed Central journal article supplement (PMC6375224)
Supplement: supp_7.1.E73_2018-0113-1-at.pdf [file supp_7.1.E73_2018-0113-1-at.pdf]

## Appendix 1 (as supplied by the authors)

Table 3 supplemental: Mean matched-pair differences in healthcare costs by team and overall, between exposed and unexposed patients in the last 30 days of life (n = 3,109)

| Team    | N of pairs (each arm) | Median Cost Unexposed | Median Cost Exposed | Mean paired difference | Lower 95CL | Upper 95CL | Pr >  t *         |
|---------|-----------------------|-----------------------|---------------------|------------------------|------------|------------|-------------------|
| Overall | 3,109                 | \$9,383               | \$8,299             | -\$512                 | -\$641     | -\$383     | <b>&lt;0.0001</b> |
| 1       | 828                   | \$9,553               | \$9,503             | -\$307                 | -\$556     | -\$57      | <b>0.016</b>      |
| 2       | 197                   | \$6,314               | \$7,905             | \$396                  | \$14       | \$778      | 0.042             |
| 3       | 124                   | \$9,216               | \$6,738             | -\$957                 | -\$1,545   | -\$369     | <b>0.001</b>      |
| 4       | 117                   | \$7,469               | \$5,126             | -\$736                 | -\$1,224   | -\$249     | <b>0.003</b>      |
| 5       | 99                    | \$7,067               | \$6,965             | \$170                  | -\$354     | \$694      | 0.52              |
| 6       | 76                    | \$9,238               | \$8,940             | \$135                  | -\$584     | \$854      | 0.71              |
| 7       | 663                   | \$10,698              | \$8,524             | -\$657                 | -\$897     | -\$418     | <b>&lt;0.0001</b> |
| 8       | 448                   | \$9,856               | \$6,498             | -\$905                 | -\$1,256   | -\$554     | <b>&lt;0.0001</b> |
| 9       | 275                   | \$8,308               | \$7,300             | -\$884                 | -\$1,519   | -\$249     | <b>0.006</b>      |
| 10      | 167                   | \$8,399               | \$10,103            | -\$31                  | -\$642     | \$580      | 0.92              |
| 11      | 115                   | \$12,928              | \$10,782            | -\$1,285               | -\$2,016   | -\$555     | <b>&lt;0.0001</b> |

\*Bold indicates significant cost savings of exposed arm, p<0.05
