# Supplementary material
Source: PubMed Central journal article supplement (PMC6375224)
Supplement: supp_7.1.E73_2018-0113-2-at.pdf [file supp_7.1.E73_2018-0113-2-at.pdf]

**Appendix 2 (as supplied by the authors)**

**Table 4 supplemental: Matched paired difference overall and by health care sector – Actual versus weighted (by team size) matched pair differences in cost (n=3109)**

Actual cost difference per patient pair

| Health Care Sector   | Individual Mean Difference (\$) | SD (\$) | Confidence (\$) | Lower 95CL (\$) | Upper 95CL (\$) | t-value  | p-value*       |
|----------------------|---------------------------------|---------|-----------------|-----------------|-----------------|----------|----------------|
| Physician            | 15.82                           | 299.99  | 10.54           | 5.27            | 26.36           | 2.940351 | 0.00330        |
| Sub-acute care       | 33.61                           | 552.74  | 19.43           | 14.18           | 53.04           | 3.390409 | 0.00071        |
| Home care            | 189.14                          | 1087.34 | 38.22           | 150.92          | 227.36          | 9.699197 | 0.00000        |
| Hospital             | -733.17                         | 6174.74 | 217.05          | -950.22         | -516.12         | 6.620608 | <b>0.00000</b> |
| Emergency department | -17.19                          | 300.56  | 10.57           | -27.75          | -6.62           | 3.18817  | <b>0.00145</b> |
| Overall Total        | -511.79                         | 4794.42 | 168.53          | -680.32         | -343.26         | 5.952013 | <b>0.00000</b> |

Adjusted costs difference per patient pair, weighted by number of decedents in each team

| Health Care Sector   | Individual Mean Difference (\$) | SD (\$) | Confidence (\$) | Lower 95CL (\$) | Upper 95CL (\$) | t-value  | p-value*       |
|----------------------|---------------------------------|---------|-----------------|-----------------|-----------------|----------|----------------|
| Physician            | -11.50                          | 239.27  | 8.41            | -19.91          | -3.09           | 2.68074  | <b>0.00738</b> |
| Sub-acute care       | 54.40                           | 503.29  | 17.69           | 36.71           | 72.09           | 6.027215 | 0.00000        |
| Home care            | 164.29                          | 804.26  | 28.27           | 136.02          | 192.56          | 11.39003 | 0.00000        |
| Hospital             | -655.47                         | 5451.39 | 191.62          | -847.09         | -463.84         | 6.704295 | <b>0.00000</b> |
| Emergency department | -11.98                          | 232.34  | 8.17            | -20.15          | -3.82           | 2.875673 | <b>0.00406</b> |
| Overall Total        | -460.26                         | 4272.35 | 150.18          | -610.44         | -310.08         | 6.006813 | <b>0.00000</b> |

A negative number reflects a cost reduction among exposed (team) decedents compared to unexposed (usual) care

\*Bold indicates significant cost savings of exposed arm, p<0.05
