# Supplementary material
Source: PubMed Central journal article supplement (PMC6375224)
Supplement: supp_7.1.E73_2018-0113-original-submission.pdf [file supp_7.1.E73_2018-0113-original-submission.pdf]

1  
2  
3 Title: Community-based specialist palliative care teams reduce health system costs at end of life:  
4 A pooled-analysis of 11 teams  
5

6 Authors: Lialoma Salam-White MSc, Daryl Bainbridge PhD, Hsien Seow PhD  
7

8  
9 Lialoma Salam-White, MSc  
10 Decision Support Manager  
11 Hamilton Niagara Haldimand Brant Local Health Integration Network  
12 264 Main St E, Grimsby, ON L3M 1P8  
13 Email: [lia.salam-white@lhins.on.ca](mailto:lia.salam-white@lhins.on.ca)  
14

15  
16 Daryl Bainbridge, PhD  
17 Senior Research Coordinator  
18 Department of Oncology, McMaster University, Hamilton ON Canada  
19 Juravinski Cancer Centre  
20 699 Concession St. Rm 4-214, Hamilton, ON Canada L8V 5C2  
21 Email: [bainbridgd@hhsc.ca](mailto:bainbridgd@hhsc.ca)  
22

23  
24 Hsien Seow, PhD, Corresponding author  
25 Associate Professor  
26 Department of Oncology, McMaster University, Hamilton ON Canada  
27 Escarpment Cancer Research Institute, Hamilton ON Canada  
28 Juravinski Cancer Centre  
29 699 Concession St. Rm 4-229, Hamilton ON Canada L8V 5C2  
30 Email: [seowh@mcmaster.ca](mailto:seowh@mcmaster.ca)  
31

32  
33 Corresponding Author and Guarantor for the study:

34 Hsien Seow, PhD  
35 Assistant Professor, Department of Oncology, McMaster University  
36 699 Concession St, 4th Fl, Rm 4-229, Hamilton, Ontario, L8V 5C2  
37 Phone: 905-387-9711, Ext. 67175  
38 Fax: 905-575-6308  
39 Email: [seowh@mcmaster.ca](mailto:seowh@mcmaster.ca)  
40

41  
42 Details of Funding and role of the study sponsors:

43 This study was funded by a grant from the Canadian Institutes of Health Research (Ref# 115112)  
44 and utilized databases maintained by the Institute for Clinical Evaluative Sciences (ICES), which  
45 receives funding by the Ontario Ministry of Health and Long-Term Care (MOHLTC) (Contract  
46 No. 2011-0006). The opinions, results and conclusions reported in this paper are those of the  
47 authors and are independent from the funding sources.  
48  
49

50 Details of contributors:

51 HS was responsible for study design and data acquisition. All authors were involved in the data  
52 analysis, interpretation of data and writing of the manuscript, and take responsibility for the  
53 integrity of the data and the accuracy of the data analysis.  
54  
55  
56  
57  
58  
59  
60

1  
2  
3 Competing Interest Declaration:

4 Authors report having no potential conflicts of interest; all authors' spouses, partners, or children  
5 have no financial relationships that may be relevant to the submitted work; and all authors have  
6 no non-financial interests that may be relevant to the submitted work.  
7

8  
9 Transparency Declaration:

10 The senior author, Hsien Seow, affirms that the manuscript is an honest, accurate, and  
11 transparent account of the study being reported; no important aspects of the study have been  
12 omitted; and any discrepancies from the study as planned have been explained.  
13

14  
15 Details of ethical approval:

16 The study was approved by McMaster University's research ethics board (11-403).  
17

18 Data Sharing Statement:

19 No additional data available.  
20

21 Word count: Abstract: 250 Text: 2835  
22  
23  
24  
25  
26  
27  
28  
29  
30  
31  
32  
33  
34  
35  
36  
37  
38  
39  
40  
41  
42  
43  
44  
45  
46  
47  
48  
49  
50  
51  
52  
53  
54  
55  
56  
57  
58  
59  
60

Confidential

## ABSTRACT

**BACKGROUND:** Access to community-based specialist palliative care teams has been shown to improve patients' quality of life; however, the impact on health system expenditures is unclear. This study aims to determine whether exposure to these teams reduces health system costs compared to usual care.

**METHODS:** A pooled analysis of a retrospective cohort study in Ontario, Canada using linked administrative data. Decedents treated by one of 11 community-based specialist palliative care teams in 2009-2011 were propensity-score matched (comorbidity, extent of homecare, etc.) to similar decedents in usual care. The teams are comprised of a core group of specialized physicians, nurses, and other providers, with a role of managing symptoms around-the-clock, providing education, and coordinating care. Our primary outcome is the pooled difference in health system costs (among five health care sectors) between matched-pairs of exposed versus unexposed patients in the last 30 days of life.

**RESULTS:** The pooled cohort of decedents included 3,109 matched-pairs. Among matched-pairs, the mean health system cost difference was \$512 (95% CIs [-\$641, -\$383]) lower in the last 30 days among exposed compared to usual care patients. Within the health sectors in the last 30 days, the mean homecare cost difference was \$189 higher (95% CIs [-\$161, -\$217]) and the mean hospital cost difference was \$733 lower (95% CIs [-\$924, -\$541]) among matched-pairs.

**INTERPRETATION:** Our study suggests that access to community-based specialist teams reduces health system costs compared to usual care alone. Savings were driven by decreased hospital costs, associated with the teams providing in-home support.

## Introduction

Research has consistently demonstrated that access to specialist palliative care teams in the community improves the quality of life for end-of-life patients<sup>1-3</sup> and helps actualize their preference for a home death<sup>4-6</sup>. Although there is wide variation in the configuration of these teams that have been evaluated, they often consist of a core team of interdisciplinary providers with palliative care expertise including physicians, nurses, and personal support workers who deliver support to patients in their homes.<sup>7</sup> In addition, there is growing evidence that these specialist palliative care teams help reduce the use of health system resources.<sup>8</sup> Specialist teams provide enhanced symptom management, monitor the patient's condition and offer education to family caregivers, that may proactively avoid crises that would otherwise result in hospitalizations, that can be costly.<sup>6, 9, 10</sup> However, the actual impact of these interventions in reducing health system costs is less clear. Systematic reviews of outcomes of community-based palliative care, including services in the home, have reported mixed evidence of lower costs and difficulty in drawing definitive conclusions due to heterogeneity in the components between interventions and different health systems.<sup>4, 11-13</sup>

The purpose of our study is to examine the impact of community-based specialist palliative care teams on health system costs compared to usual care, such as end-of-life homecare alone. In Ontario, Canada, several regions have independently created their own specialist palliative care teams that vary in team composition, caseload, and geography served. This forms a natural experiment to examine multiple diverse specialist palliative care teams within a single health care system. Specifically, this study investigates whether there are health system cost differences between propensity-score matched pairs of patients who received specialist palliative care teams versus usual care within the overall pooled cohort and individual teams.

## Methods

### Study design

This is a retrospective cohort study of deceased palliative care patients in Ontario, Canada, during fiscal years 2009-2011. We examined health system costs in the last 30 days of life for patients who received services from one of 11 interdisciplinary palliative care teams (exposed) and used propensity score matching to create an equivalent comparison group of patients who received usual care (unexposed). The demographic and service use characteristics of the cohort were identified by linking health care administrative datasets using encrypted unique patient identifiers. The cost differences between matched pairs was determined for each of the teams separately and collectively to determine an overall pooled cohort effect.

### Study setting

In Ontario, the majority of community-based palliative care is delivered by homecare providers (e.g., nurses and personal support workers)<sup>14</sup> referred to in this study as the unexposed "usual care" group. In usual care, there is no involvement from community-based specialist palliative care teams. Patients are eligible for homecare if they require nursing care, personal support care or therapy, and are eligible for "end-of-life" homecare if they also have a life limiting or life threatening health condition with a prognosis of less than 6 months to live and they have pain and symptom issues related to the end of life. The end-of-life designation entitles

1  
2  
3 patients to more homecare hours and sometimes providers with more end-of-life care  
4 experience.<sup>15</sup> Population-based data in the province show that about a third of deceased patients  
5 receive homecare in the last year of life and 19% receive end-of-life homecare.<sup>16</sup> Over half  
6 (56%) of deaths occur in hospital and 20% occur at home.<sup>14, 17</sup> Access to homecare or other  
7 palliative care services such as residential hospices (i.e., free-standing, home-like facilities in the  
8 community) and hospital palliative care units are very limited.<sup>18</sup> End-of-life homecare may be  
9 provided by one or more service provider organizations, with little coordination between them.  
10 Furthermore, care provided by these organizations vary in palliative care training of the  
11 homecare workers and extent of after-hours coverage. Moreover, most family physicians provide  
12 care independently of homecare and rarely make home visits.<sup>19</sup> In contrast, care from a specialist  
13 palliative care team, referred to in this study as the exposed group, provides care that is  
14 accessible around-the-clock, coordinated, and provided by specially trained providers.  
15  
16  
17

### 18 **Specialist palliative care teams**

19 In Ontario, regions have independently developed their own community-based, specialist,  
20 palliative care teams to improve palliative care access and delivery over time.<sup>20</sup> These teams vary  
21 in geography served, patient admissions (range 90-830 patient deaths over 2 years), and team  
22 size (3 to 18 Full Time Equivalent [FTE]) (Table 1). The mean time from admission to a  
23 specialist palliative care team to death was 73 days. However, they all consist of a core group of  
24 interdisciplinary providers including community physicians and nurses with specialized  
25 palliative care expertise. Some teams also involve allied health professionals, such as social  
26 workers and psychosocial-spiritual counselors. The common roles of the community-based  
27 specialist palliative care teams include ongoing comfort care, symptom management 24/7,  
28 education, care coordination. Patients are usually referred to the teams during the last months of  
29 life based on clinical factors, functional decline, and expected prognosis of less than six months.  
30 The specialist team visits the patient in-home to assess needs and develop a care plan. These  
31 teams work in conjunction with homecare services, including nurses and personal support  
32 workers, to provide integrated palliative care in patients' homes, similar to visiting hospice  
33 services by MacMillan nurses in the United Kingdom. The structure and development of these  
34 teams have been previously described in detail.<sup>20, 21</sup>  
35  
36  
37  
38

### 39 **Cohort selection**

40 *Exposed group:* Eleven teams were identified that met the above criteria as well as the  
41 following: (1) had little or no change in staffing or structure during the cohort timeframe (2009  
42 to 2011); (2) did not limit admission criteria to one disease, e.g., cancer; and (3) served more  
43 than 50 patients a year. Within each team, patients were included if they died by April 1 2011,  
44 were at least 18 years of age, and had a valid provincial health insurance number.  
45  
46

47 *Unexposed group:* Two a priori approaches were taken to identify appropriate control  
48 groups depending on how long the team had been established. One, for teams that were  
49 established after 2009 (teams 1 to 6), a pool of decedents was matched within the same health  
50 regions during fiscal years 2007-2009 (two years before the team was established). The research  
51 team confirmed that no major policy or organizational changes occurred in these study regions  
52 between 2007 and 2011, with the exception of the introduction of the teams.<sup>6</sup> Two, for teams that  
53 started before 2009 (teams 7 to 11), a pool of decedents was matched from similarly resourced  
54 regions (i.e., similar in size, geography, access to homecare services, but did not have access to  
55  
56  
57  
58  
59  
60

1  
2  
3 community-based specialist palliative care teams) during the same study period of 2009-2011.  
4 This second approach was taken because: i) many of these teams were established a decade or  
5 more ago, where a pre-team cohort would not be reasonably comparable to 2009-2011; and ii)  
6 because a major health policy that regionalized homecare occurred in 2006, making comparisons  
7 prior to this time problematic.<sup>22</sup>  
8  
9

### 10 **Data sources**

11 The teams provided their patient lists during fiscal years 2009-2011 that were linked to  
12 multiple administrative data bases using the patients' provincial health insurance numbers. The  
13 provincial vital statistics database was used to confirm date of death. The Discharge Abstract  
14 Database was used to determine hospital and palliative care unit admissions, as well as  
15 comorbidity score weight, presence of cancer condition and hospital death. We used the National  
16 Ambulatory Care Reporting System to determine emergency department visits. The Continuing  
17 Care Reporting System was used to calculate cost in chronic or complex in-patient beds. The  
18 Home Care Database provided dates of publicly funded homecare service use and service type.  
19 The Ontario Health Insurance Plan database and the physician billing codes were used to  
20 determine physician visits. We used Statistics Canada census data on postal codes to determine  
21 region and rurality. These linked datasets were also used to determine the pool of unexposed  
22 patients.  
23  
24  
25

### 26 **Propensity score matching**

27 We used propensity score matching to match on propensity to have received the  
28 community-based specialist palliative care team and create equivalent comparison groups in  
29 usual care for each intervention team. Matching on the propensity score can estimate the effect of  
30 the intervention, which is unbiased by differences in measured pre-intervention covariates.<sup>23</sup> We  
31 matched on variables prior to exposure to the intervention: age at death, sex, cancer or non-  
32 cancer, homecare service type (palliative, supportive, maintenance, rehabilitation) and time in  
33 homecare, Aggregated Diagnosis Group (comorbidity weighting that determines clinically  
34 cogent groups from 6 to 18 months before death),<sup>24</sup> hospital and emergency department use  
35 before death (during the period from 6 to 18 months before death).<sup>6</sup> Eleven cohorts were created,  
36 consisting of pairs of exposed patients and unexposed subjects who were selected from the  
37 appropriate control population (see cohort selection).  
38  
39  
40

### 41 **Outcomes**

42 The primary outcome is the paired-difference in total health system costs between the  
43 matched-pairs of exposed versus unexposed groups in the last 30 days of life across the overall  
44 aggregated pooled cohort. We also calculated the paired-difference in health system costs for  
45 each individual team. Health system costs consisted of the five health care sectors: 1) physician  
46 visits, 2) sub-acute care,<sup>25</sup> 3) homecare, 4) inpatient hospitalization, and 5) emergency  
47 department. The secondary outcome is the paired-difference in health care sector-specific costs  
48 respectively, in the last 30 days of life for the overall pooled cohort. Costing macros that have  
49 been validated in Ontario data were applied to calculate costs for the above services.<sup>26</sup> All  
50 physician costs beyond palliative home visits were included, regardless of specialty or care  
51 setting.  
52  
53  
54

### 55 **Statistical Analysis**



1  
2  
3  
4 Descriptive statistics were used to examine patient characteristics and health system  
5 costs. We used paired t-tests (among propensity score matched patient pairs) to determine if  
6 health system costs in the last 30 days of life were statistically different between the exposed and  
7 unexposed matched pairs across the overall pooled cohort. The pooled cohort was comprised of  
8 the matched-pairs, considered independently, pooled into an aggregate total cohort, akin to a  
9 meta-analysis of 11 separate studies. We also used paired t-tests to determine significance among  
10 paired-differences in health system costs in the last 30 days of life for each of the 11 teams  
11 respectively, summarized in a forest-plot. Additionally, we report the paired-difference in cost  
12 for each health care sector for the overall pooled cohort. Analysis was completed using SAS v9  
13 statistical software. All tests were two-sided and a p-value of 0.05 or less was considered  
14 statistically significant.  
15

### 16 17 **Ethics Approval**

18 The study was approved by Hamilton Health Sciences/McMaster University research  
19 ethics review board, Ontario, Canada (11-403).  
20

### 21 22 **Results**

23 In total, the specialist teams (exposed) served 3,912 patients, whereas the control regions  
24 had 41,113 deaths (Table 2). The characteristics between the initial exposed and unexposed  
25 groups differed greatly before propensity score matching, for instance, 79% had a cancer  
26 diagnosis and 78% received end-of-life homecare services in the exposed group, compared to  
27 only 35% and 15% in the unexposed group ( $p < 0.001$ ), respectively. Propensity score matching  
28 created similar groups across a number of patient characteristics, generating 3,109 paired  
29 decedents. In both groups after matching, 79% had cancer diagnosis and 78% received end-of-  
30 life homecare services. The main difference between the two groups is their exposure to a  
31 community-based specialist palliative care team.  
32  
33

### 34 35 **Overall pooled cohort and individual team health system costs**

36 In the overall pooled cohort, the median health system costs in the last 30 days of life  
37 were \$8,299 per decedent in the exposed group compared to \$9,383 per decedent in the  
38 unexposed group. This results in a median paired difference in health system costs per patient of  
39 \$512 (95% Confidence Interval [CI] [-\$641, -\$383]) lower at 30 days (all  $p < 0.0001$ ) among  
40 exposed versus unexposed patients. (Figure 1, Supplemental Table 3)  
41

42 Looking at regional teams individually in the last 30 days of life, we found 7 of the 11  
43 teams were associated with significant mean paired cost reductions. The 7 teams with significant  
44 mean paired differences in costs range from \$1,285 to \$307 lower among the exposed than the  
45 unexposed group. The four teams that did not have significant paired cost reductions at 60 days  
46 ranged from \$397 to -\$31 cost differences between exposed versus unexposed.  
47

### 48 49 **Costs by health care sector**

50 Mean paired differences in health care costs in the last 30 days before death differed by  
51 sector as well (Figure 2). The greatest cost differences are observed in homecare and hospital  
52 sectors. At 30 days, the paired-differences show that the exposed group has higher mean  
53 homecare costs by \$189 (95% CIs [-\$161, -\$217]) than the unexposed, but has lower hospital  
54 costs by \$733 (95% CIs [-\$924, -\$541]). Though statistically significant, there were not  
55  
56  
57  
58  
59  
60

1  
2  
3 clinically significant differences in costs among matched pairs in emergency department use,  
4 sub-acute care or physician services.  
5  
6  
7

## 8 **Interpretation**

9  
10 Our pooled analysis of 11 community-based specialist palliative care teams suggests that  
11 exposure to these teams compared to usual homecare is associated with a reduction in health  
12 system costs at the end of life. Our data suggest that access to community-based specialist  
13 palliative care teams, in addition to usual care (which was primarily end-of-life homecare  
14 services), helps to reduce end-of-life hospital cost. These findings were consistent even though  
15 the teams differed in geography, team size, and team organization.  
16

17 Generally, teams seemed to keep patients in the home and avoid or reduce  
18 hospitalizations. Because the teams aim to expertly manage, constantly monitor, and rapidly  
19 respond to complex symptoms and changes in the patient's condition in the home 24/7, they can  
20 help patients to stay at home, where they might otherwise go to hospital. Indeed in most teams  
21 comparing exposed to unexposed, we found a reduction in hospital costs with more than offset  
22 the higher homecare costs. The homecare service (including the cost of delivering community-  
23 based specialist palliative care teams) cost a fraction of that of a hospital bed, which typically  
24 ranges from \$1000-2000 per day for non-critical care,<sup>9, 27-29</sup> which can lead to overall health  
25 system savings. Furthermore, support and education from the specialist palliative care teams may  
26 prompt patients and families to choose comfort care measures rather than aggressive treatments  
27 in hospital.  
28

29  
30 Nonetheless, among the 11 community-based specialist palliative care teams, four teams  
31 (team 2, 5, 6 and 10) did not individually show significant cost savings. This may be due to a few  
32 factors: they tended to be very small teams, serving no more than 40-100 decedents per year in  
33 large rural or suburban geographies. As well, two of the teams only had a half FTE palliative  
34 care physician.  
35

## 36 **Comparison to other studies**

37  
38 Two systematic reviews examined the cost benefits of home-based palliative care  
39 interventions, identifying over a dozen randomized trials that included cancer and non-cancer  
40 populations.<sup>4, 8</sup> These reviews concluded that the evidence for cost-benefit was inconclusive,  
41 since the community-based team interventions were very heterogeneous: the interventions  
42 differed (e.g. some were telephone-based, education only, nurse-led only, did not include  
43 afterhours coverage, etc.); the countries and health systems differed; and the cost outcome  
44 definitions differed. Our study is unique because it includes independent teams, where the core  
45 components of the team-based intervention were the same, occurring in the same health system,  
46 with standardized outcome definitions. However, our study population did mainly (80%) serve  
47 cancer patients.  
48  
49

## 50 **Limitations**

51  
52 We could not match on data that are unavailable in administrative data, such as  
53 availability of existing caregiver support, patient preferences for hospital use, marital status, and  
54 education level. We did not adjust for covariates using a regression since there were no  
55 significant differences after propensity score matching, though income quintiles were not  
56 balanced. Furthermore, not all potential costs are accounted for, such as drugs, costs of private  
57  
58  
59  
60



1  
2  
3  
4  
5  
6  
7  
8  
9  
10  
11  
12  
13  
14  
15  
16  
17  
18  
19  
20  
21  
22  
23  
24  
25  
26  
27  
28  
29  
30  
31  
32  
33  
34  
35  
36  
37  
38  
39  
40  
41  
42  
43  
44  
45  
46  
47  
48  
49  
50  
51  
52  
53  
54  
55  
56  
57  
58  
59  
60

homecare services, or other indirect costs incurred by informal caregivers. Our study period of 2009-2011 was due to lags in administrative data linkage, but remains relevant in that there have been no major policy changes within the homecare sector and there has been little decrease in the proportion of deaths in hospital since then.<sup>17</sup> In addition, for the five older teams matched to decedents from a comparable region, there may have been regional differences leading to confounding. Finally, we did not differentiate multiple visits within hospital costs; nonetheless, even among cancer patients who die in hospital in Ontario, the majority (77%) only have a single visit in the last month.<sup>30</sup> A strength of the study is that we propensity-score matched the exposed and unexposed groups based on cancer/non-cancer diagnosis, end-of-life homecare use, length of time in homecare, and comorbidity, controlling for major factors affecting access to a specialist palliative care team.

### Conclusion

Although the teams vary in composition and geography, the core team interventions contain common components, such as expert symptom management, patient education, coordination of care, 24/7 telephone access, and on-going conversations about care preferences. Our findings demonstrate that specialist palliative care teams that feature these qualities are associated with reduced use of costly hospital care, which contributed to health system cost savings. Involvement from a community-based specialist palliative care team is one method for reducing the high cost of end-of-life care. Future research should examine which aspects of the specialist palliative care teams are most attributable to reduced health system costs using multi-level regression models and the impact of these teams on informal caregiver costs.

## Reference List

- 1  
2  
3  
4  
5  
6  
7  
8 (1) Higginson IJ, Evans CJ. What is the evidence that palliative care teams improve  
9 outcomes for cancer patients and their families? *Cancer J* 2010;16(5):423-435.
- 10  
11 (2) Kassianos AP, Ioannou M, Koutsantoni M, Charalambous H. The impact of specialized  
12 palliative care on cancer patients' health-related quality of life: a systematic review and  
13 meta-analysis. *Support Care Cancer* 2018;26(1):61-79.
- 14  
15 (3) Shepperd S, Wee B, Straus SE. Hospital at home: home-based end of life care. *Cochrane*  
16 *Database of Systematic Reviews* 2011.
- 17  
18 (4) Gomes B, Calanzani N, Curiale V, McCrone P, Higginson IJ. Effectiveness and cost-  
19 effectiveness of home palliative care services for adults with advanced illness and their  
20 caregivers. *Cochrane Database Syst Rev* 2013;6:CD007760.
- 21  
22 (5) Lockett T, Davidson PM, Lam L, Phillips J, Currow DC, Agar M. Do community  
23 specialist palliative care services that provide home nursing increase rates of home death  
24 for people with life-limiting illnesses? A systematic review and meta-analysis of  
25 comparative studies. *J Pain Symptom Manage* 2013;45(2):279-297.
- 26  
27 (6) Seow H, Brazil K, Sussman J et al. Impact of community based, specialist palliative care  
28 teams on hospitalisations and emergency department visits late in life and hospital deaths:  
29 a pooled analysis. *BMJ* 2014;348:g3496.
- 30  
31 (7) Bainbridge D, Seow H, Sussman J. Common components of efficacious in-home end-of-  
32 life care programs: A review of systematic reviews. *J Am Geriatr Soc* 2016;64(3):632-  
33 639.
- 34  
35 (8) Smith S, Brick A, O'Hara S, Normand C. Evidence on the cost and cost-effectiveness of  
36 palliative care: a literature review. *Palliat Med* 2014;28(2):130-150.
- 37  
38 (9) Bekelman JE, Halpern SD, Blankart CR et al. Comparison of Site of Death, Health Care  
39 Utilization, and Hospital Expenditures for Patients Dying With Cancer in 7 Developed  
40 Countries. *JAMA* 2016;315(3):272-283.
- 41  
42 (10) Cheung MC, Earle CC, Rangrej J et al. Impact of aggressive management and palliative  
43 care on cancer costs in the final month of life. *Cancer* 2015;121(18):3307-3315.
- 44  
45 (11) Candy B, Holman A, Leurent B, Davis S, Jones L. Hospice care delivered at home, in  
46 nursing homes and in dedicated hospice facilities: A systematic review of quantitative  
47 and qualitative evidence. *Int J Nurs Stud* 2011;48(1):121-133.
- 48  
49 (12) Garcia-Perez L, Linertova R, Martin-Olivera R, Serrano-Aguilar P, Benitez-Rosario MA.  
50 A systematic review of specialised palliative care for terminal patients: which model is  
51 better? *Palliat Med* 2009;23(1):17-22.
- 52  
53  
54  
55  
56  
57  
58  
59  
60

- 1  
2  
3 (13) Zimmermann C, Riechelmann R, Krzyzanowska M, Rodin G, Tannock I. Effectiveness  
4 of specialized palliative care: a systematic review. *JAMA* 2008;299(14):1698-1709.  
5
- 6  
7 (14) Bainbridge D, Seow H. Palliative Care Experience in the Last 3 Months of Life: A  
8 Quantitative Comparison of Care Provided in Residential Hospices, Hospitals, and the  
9 Home From the Perspectives of Bereaved Caregivers. *Am J Hosp Palliat Care*  
10 2018;35(3):456-463.  
11
- 12 (15) Bainbridge D, Seow H, Sussman J, Pond G, Barbera L. Factors associated with not  
13 receiving homecare, end-of-life homecare, or early homecare referral among cancer  
14 decedents: A population-based cohort study. *Health Policy* 2015;119(6):831-839.  
15
- 16 (16) Tanuseputro P, Budhwani S, Bai YQ, Wodchis WP. Palliative care delivery across health  
17 sectors: A population-level observational study. *Palliat Med* 2017;31(3):247-257.  
18
- 19 (17) Statistics Canada. Deaths in hospital and elsewhere, Canada, provinces and territories.  
20 Ottawa; 2018. Available from:  
21 [https://www150.statcan.gc.ca/t1/tb11/en/tv.action?pid=1310071501&pickMembers%5B0](https://www150.statcan.gc.ca/t1/tb11/en/tv.action?pid=1310071501&pickMembers%5B0%5D=1.7)  
22 [%5D=1.7](https://www150.statcan.gc.ca/t1/tb11/en/tv.action?pid=1310071501&pickMembers%5B0%5D=1.7)  
23  
24
- 25 (18) Sussman J, Barbara L, Bainbridge D et al. Health system characteristics of quality care  
26 delivery: A comparative case study evaluation of palliative care for cancer patients in  
27 four regions in Ontario, Canada. *Palliat Med* 2011;26(4):322-335.  
28
- 29 (19) Marshall D, Howell D, Brazil K, Howard M, Taniguchi A. Enhancing family physician  
30 capacity to deliver quality palliative home care: an end-of-life, shared-care model. *Can*  
31 *Fam Physician* 2008;54(12).  
32  
33
- 34 (20) Seow H, Bainbridge D, Brouwers M, Bryant D, Tan TS, Kelley ML. Common care  
35 practices among effective community-based specialist palliative care teams: a qualitative  
36 study. *BMJ Support Palliat Care* 2017.  
37
- 38 (21) Seow H, Bainbridge D. The development of specialized palliative care in the community:  
39 A qualitative study of the evolution of 15 teams. *Palliat Med* 2018;32(7):1255-1266.  
40
- 41 (22) Government of Ontario. Local Health System Integration Act. S.O.2006, c.4 . 2006.  
42 Available from: <https://www.ontario.ca/laws/statute/06l04>  
43  
44
- 45 (23) Rosenbaum P, Rubin D. Constructing a control group using multivariate matched  
46 sampling methods that incorporate the propensity score. *The American Statistician*  
47 1985;39(1):33-38.  
48
- 49 (24) Austin PC, van Walraven C, Wodchis WP, Newman A, Anderson GM. Using the Johns  
50 Hopkins Aggregated Diagnosis Groups (ADGs) to predict mortality in a general adult  
51 population cohort in Ontario, Canada. *Med Care* 2011;49(10):932-939.  
52  
53  
54  
55  
56  
57  
58  
59  
60

- 1  
2  
3 (25) Ontario Ministry of Health and Long-Term Care. Hospital chronic care co-payment  
4 questions and answers. 2018. Available from:  
5 <http://www.health.gov.on.ca/en/public/publications/chronic/chronic.aspx#chroniccare>  
6  
7  
8 (26) Wodchis W, Bushmeneva K, Nikitovic M, McKillop I. Guidelines on person-level  
9 costing using administrative databases in Ontario. Toronto, ON: Health System  
10 Performance Research Network; 2013. Available from:  
11 [http://www.hsprn.ca/uploads/files/Guidelines\\_on\\_PersonLevel\\_Costing\\_May\\_2013.pdf](http://www.hsprn.ca/uploads/files/Guidelines_on_PersonLevel_Costing_May_2013.pdf)  
12  
13 (27) Auditor General of Ontario. 2014 Annual report of the Office of the Auditor General of  
14 Ontario: Chapter 3.08 Palliative care. 2017. Available from:  
15 <http://www.auditor.on.ca/en/content/annualreports/arreports/en14/308en14.pdf>  
16  
17 (28) Georghiou T, Bardsley M. Exploring the cost of care at the end of life. 2014. Marie  
18 Curie Cancer Care. Available from:  
19 [https://www.mariecurie.org.uk/globalassets/media/documents/commissioning-our-](https://www.mariecurie.org.uk/globalassets/media/documents/commissioning-our-services/why-work/our-impact/2014-nuffield-report.pdf)  
20 [services/why-work/our-impact/2014-nuffield-report.pdf](https://www.mariecurie.org.uk/globalassets/media/documents/commissioning-our-services/why-work/our-impact/2014-nuffield-report.pdf)  
21  
22  
23 (29) Kaiser Family Foundation. Hospital adjusted expenses per inpatient day by ownership.  
24 2017. Available from: [http://kff.org/health-costs/state-indicator/expenses-per-inpatient-](http://kff.org/health-costs/state-indicator/expenses-per-inpatient-day-by-ownership)  
25 [day-by-ownership](http://kff.org/health-costs/state-indicator/expenses-per-inpatient-day-by-ownership)  
26  
27  
28 (30) DeCaria K, Dudgeon D, Green E et al. Acute care hospitalization near the end of life for  
29 cancer patients who die in hospital in Canada. *Curr Oncol* 2017;2017/08/31(4):256-261.  
30  
31  
32  
33  
34  
35  
36  
37  
38  
39  
40  
41  
42  
43  
44  
45  
46  
47  
48  
49  
50  
51  
52  
53  
54  
55  
56  
57  
58  
59  
60

**Table 1: Team characteristics prior to matching**

| Team | Date established | Geography | No. decedents FY2009-11 | Median time on service (days) | Palliative care physicians FTE (Funding source) | Nurses FTE | Other team members FTE |
|------|------------------|-----------|-------------------------|-------------------------------|-------------------------------------------------|------------|------------------------|
| 1    | 2009             | Urban     | 830                     | 40                            | 1 (FFS)                                         | 8          | 2                      |
| 2    | 2009             | Suburban  | 221                     | 53                            | 3 (FFS)                                         | 3.5        | 5                      |
| 3    | 2009             | Suburban  | 144                     | 38                            | 1 (FFS)                                         | 1          | 0.6                    |
| 4    | 2009             | Suburban  | 125                     | 40                            | 1 (FFS)                                         | 2          | 1                      |
| 5    | 2009             | Suburban  | 105                     | 36                            | 0.5 (FFS)                                       | 1          | 0.2                    |
| 6    | 2009             | Rural     | 90                      | 63                            | 2 (APP)                                         | 2          | 1.2                    |
| 7    | 1986             | Urban     | 676                     | 45                            | 11.5 (APP)                                      | 1          | 5.9                    |
| 8    | 2007             | Suburban  | 497                     | 49                            | 2 (FFS & APP)                                   | 2          | 1                      |
| 9    | 1998             | Urban     | 775                     | 38                            | 1.3 (FFS)                                       | 3          | 1.7                    |
| 10   | 2004             | Rural     | 268                     | 23                            | 0.6 (APP)                                       | 1          | 2.5                    |
| 11   | 1979             | Rural     | 181                     | 32                            | 6 (FFS)                                         | 2          | 4.7                    |

FTE=full time equivalent

FFS=Fee-For-Service, i.e., physician bills for each aspect of care and service they provide according to a set price mechanism

APP = Alternative Payment Plan, i.e., physician reimbursement is a combination of FFS and salary

**Table 2: Comparison of patient characteristics before and after propensity score matching**

| Characteristics                                                                 | Before propensity score matching |                | After propensity score matching |                | p-value |
|---------------------------------------------------------------------------------|----------------------------------|----------------|---------------------------------|----------------|---------|
|                                                                                 | Unexposed                        | Exposed        | Unexposed                       | Exposed        |         |
| <b>No of patients (pooled across the teams)</b>                                 | 41,133                           | 3,912          | 3,109                           | 3,109          |         |
| <b>Median (IQR) age at death (range years)</b>                                  | 80 (69 to 87)                    | 75 (64 to 84)  | 74 (63-83)                      | 75 (64-84)     | p>0.05  |
| <b>Cancer diagnosis, n (%)</b>                                                  | 14,443 (35.1)                    | 3,073 (78.6)   | 2,481 (79.8)                    | 2,469 (79.4)   | p>0.05  |
| <b>Female, n (%)</b>                                                            | 20,895 (50.8)                    | 2,032 (51.9)   | 1,609 (51.8)                    | 1,600 (51.5)   | p>0.05  |
| <b>Mean (SD) Adjusted Clinical Group comorbidity weighting</b>                  | 5.12 (4.09)                      | 6.30 (4.04)    | 6.21 (3.93)                     | 6.20 (3.98)    | p>0.05  |
| <b>Home care service type, n (%):</b>                                           |                                  |                |                                 |                |         |
| End of life                                                                     | 6,208 (15.1)                     | 3,041 (77.7)   | 2,409 (77.5)                    | 2,409 (77.5)   | p>0.05  |
| Long term supportive                                                            | 3,408 (8.3)                      | 210 (5.4)      | 145 (4.7)                       | 145 (4.7)      | p>0.05  |
| Maintenance                                                                     | 7,692 (18.7)                     | 328 (8.4)      | 278 (8.9)                       | 278 (8.9)      | p>0.05  |
| Rehab/acute care                                                                | 6,478 (15.7)                     | 157 (4.0)      | 106 (3.4)                       | 106 (3.4)      | p>0.05  |
| None                                                                            | 17,347 (42.2)                    | 176 (4.5)      | 171 (5.5)                       | 171 (5.5)      | p>0.05  |
| <b>Mean (SD) time from first receipt of most severe home care service type:</b> |                                  |                |                                 |                |         |
| End of life                                                                     | 15.47 (56.48)                    | 86.18 (107.29) | 79.23 (102.02)                  | 79.32 (102.05) | p>0.05  |
| Long term supportive                                                            | 23.92 (81.17)                    | 31.00 (87.25)  | 37.96 (95.92)                   | 27.84 (83.51)  | p>0.05  |
| Maintenance                                                                     | 63.68 (124.80)                   | 82.02 (131.69) | 81.64 (131.06)                  | 83.55 (132.16) | p>0.05  |
| Rehab/acute care                                                                | 69.70 (113.27)                   | 76.05 (113.98) | 79.29 (112.60)                  | 80.12 (114.96) | p>0.05  |
| <b>Mean (SD) No of prior emergency department visits</b>                        | 1.16 (2.10)                      | 1.43 (2.11)    | 1.40 (1.95)                     | 1.36 (1.96)    | p>0.05  |
| <b>Mean (SD) prior hospital length of stay (days)</b>                           | 7.18 (22.23)                     | 7.53 (17.09)   | 6.84 (14.17)                    | 6.73 (14.85)   | p>0.05  |
| <b>Mean (SD) No of prior hospital visits</b>                                    | 0.56 (1.04)                      | 0.75 (1.14)    | 0.76 (1.15)                     | 0.70 (1.07)    | p>0.05  |
| <b>Income quintile, n (%):</b>                                                  |                                  |                |                                 |                |         |
| 1 (lowest)                                                                      | 10,288 (25.0)                    | 668 (17.1)     | 772 (24.8)                      | 536 (17.2)     | p<0.01  |
| 2                                                                               | 9,053 (22.0)                     | 746 (19.1)     | 703 (22.6)                      | 605 (19.5)     | p<0.01  |
| 3                                                                               | 7,565 (18.4)                     | 720 (18.4)     | 604 (19.4)                      | 550 (17.7)     | p>0.05  |
| 4                                                                               | 7,460 (18.1)                     | 872 (22.3)     | 585 (18.8)                      | 675 (21.7)     | p<0.01  |
| 5 (highest)                                                                     | 6,555 (15.9)                     | 906 (23.2)     | 437 (14.1)                      | 743 (23.9)     | p<0.01  |



Table 3 supplemental: Mean healthcare cost differences by team and overall, between matched pairs of unexposed and exposed patients in the last 30 days of life (n= 3,109)

| Team   | N of pairs (each arm) | Median Cost Unexposed | Median Cost Exposed | Mean paired difference | Lower 95CL | Upper 95CL | Pr >  t *         |
|--------|-----------------------|-----------------------|---------------------|------------------------|------------|------------|-------------------|
| Pooled | 3,109                 | \$9,383               | \$8,299             | -\$512                 | -\$641     | -\$383     | <b>&lt;0.0001</b> |
| 1      | 828                   | \$9,553               | \$9,503             | -\$307                 | -\$556     | -\$57      | <b>0.016</b>      |
| 2      | 197                   | \$6,314               | \$7,905             | \$396                  | \$14       | \$778      | 0.042             |
| 3      | 124                   | \$9,216               | \$6,738             | -\$957                 | -\$1,545   | -\$369     | <b>0.001</b>      |
| 4      | 117                   | \$7,469               | \$5,126             | -\$736                 | -\$1,224   | -\$249     | <b>0.003</b>      |
| 5      | 99                    | \$7,067               | \$6,965             | \$170                  | -\$354     | \$694      | 0.52              |
| 6      | 76                    | \$9,238               | \$8,940             | \$135                  | -\$584     | \$854      | 0.71              |
| 7      | 663                   | \$10,698              | \$8,524             | -\$657                 | -\$897     | -\$418     | <b>&lt;0.0001</b> |
| 8      | 448                   | \$9,856               | \$6,498             | -\$905                 | -\$1,256   | -\$554     | <b>&lt;0.0001</b> |
| 9      | 275                   | \$8,308               | \$7,300             | -\$884                 | -\$1,519   | -\$249     | <b>0.006</b>      |
| 10     | 167                   | \$8,399               | \$10,103            | -\$31                  | -\$642     | \$580      | 0.92              |
| 11     | 115                   | \$12,928              | \$10,782            | -\$1,285               | -\$2,016   | -\$555     | <b>&lt;0.0001</b> |

\*Bold indicates significant cost savings of exposed arm, p<0.05

Figure 1: Mean healthcare cost differences by team and overall, between matched pairs of unexposed and exposed patients in the last 30 days of life (n= 3,109)

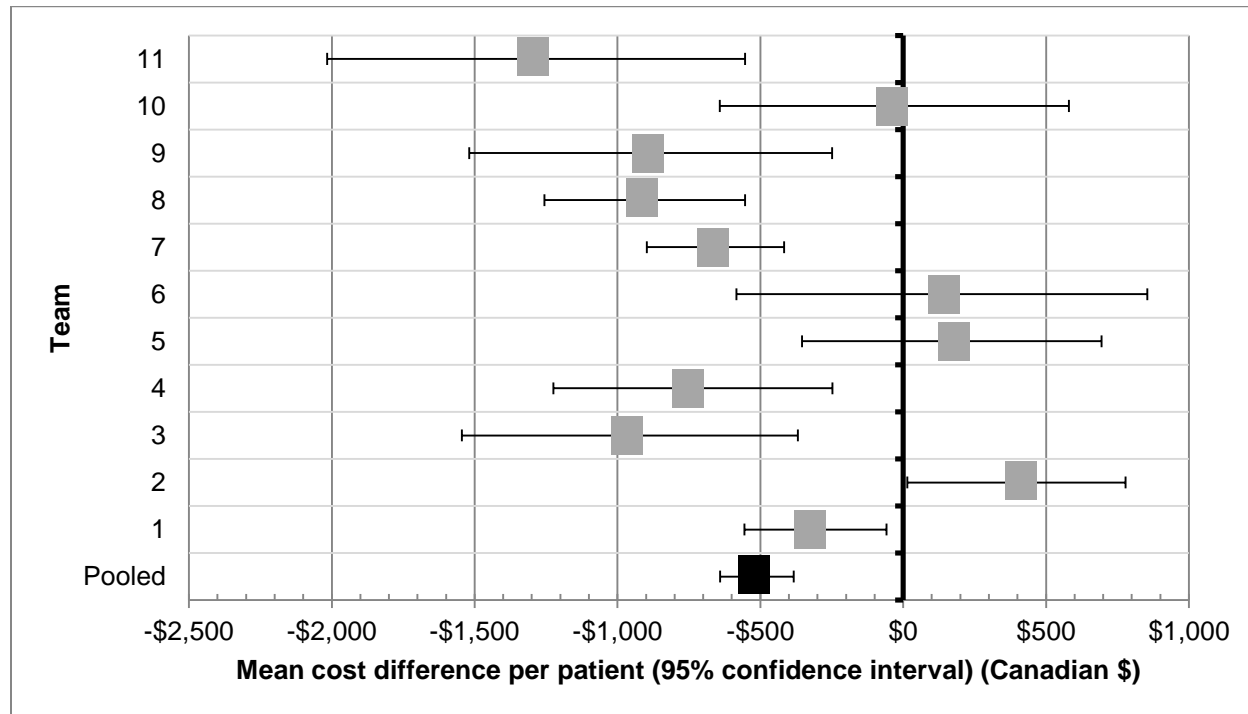

Error bars indicate 95% confidence intervals

Figure 1: Mean healthcare cost differences by team and overall, between matched pairs of unexposed and exposed patients in the last 30 days of life (n= 3,109)

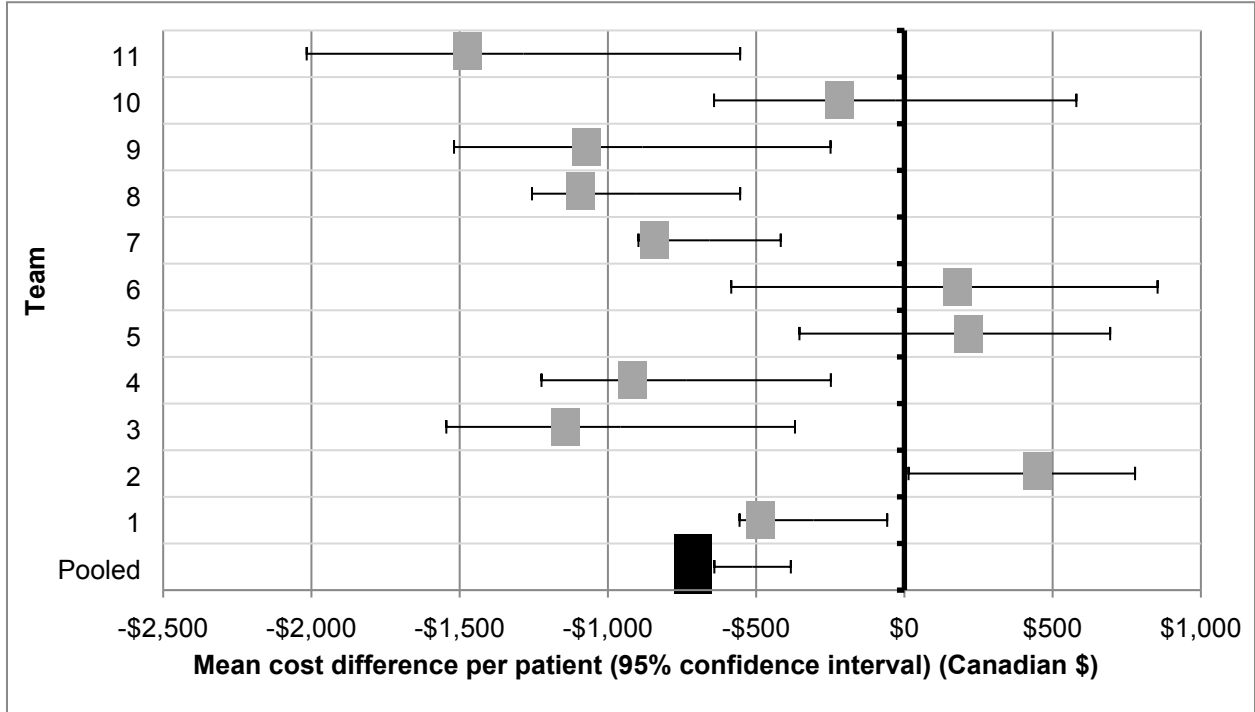

Error bars indicate 95% confidence intervals

1  
2  
3  
4  
5  
6  
7  
8  
9  
10  
11  
12  
13  
14  
15  
16  
17  
18  
19  
20  
21  
22  
23  
24  
25  
26  
27  
28  
29  
30  
31  
32  
33  
34  
35  
36  
37  
38  
39  
40  
41  
42  
43  
44  
45  
46  
47  
48  
49  
50  
51  
52  
53  
54  
55  
56  
57  
58  
59  
60

Figure 2: Mean sectorial cost differences between matched pairs of unexposed and exposed patients in the last 30 days of life (n= 3,109)

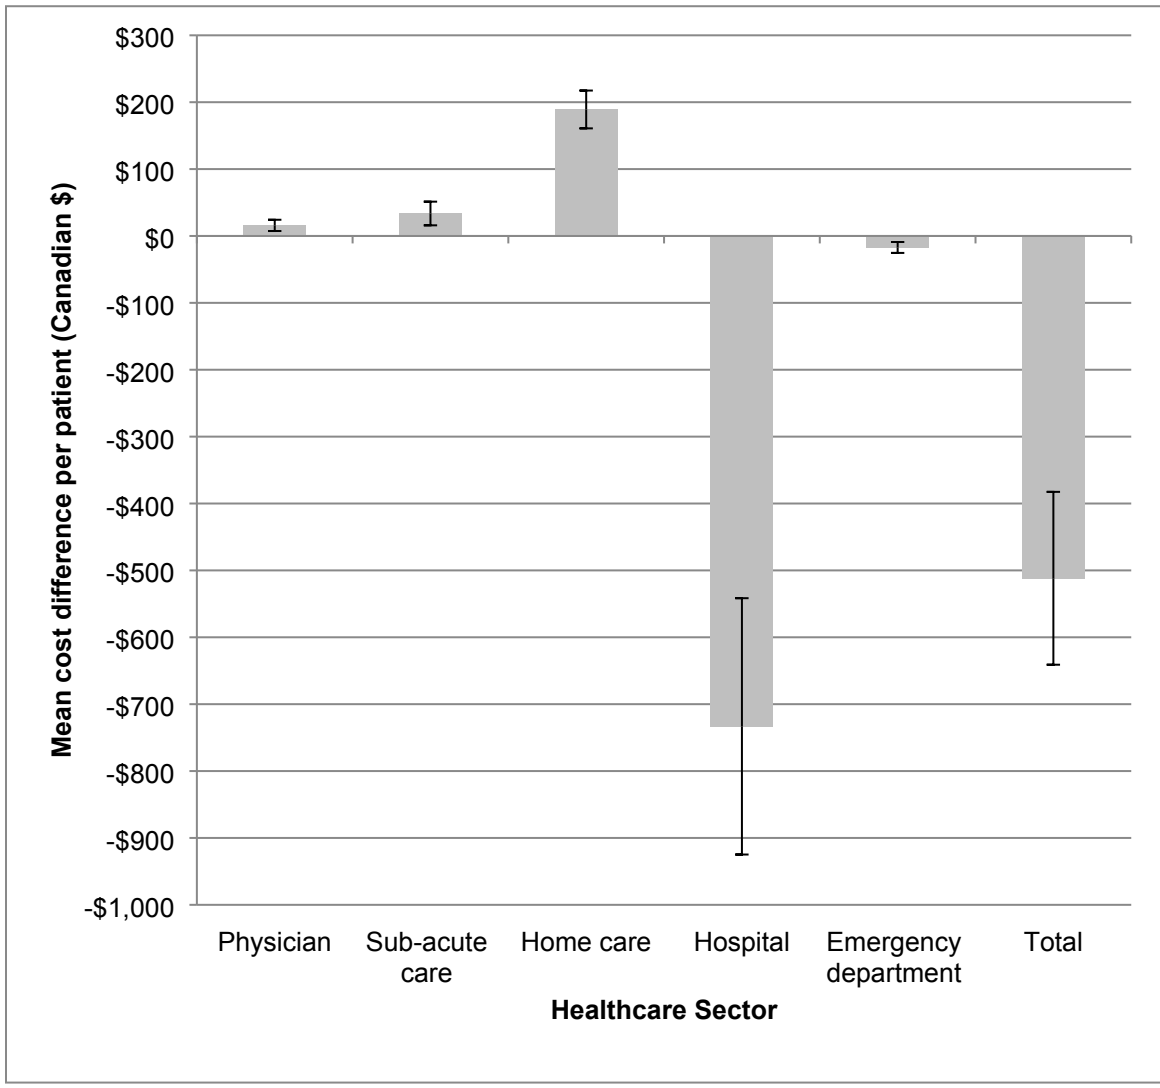

95% confidence intervals shown
